# Supplementary material for: A Systematic Review and Meta-analysis of Single-group Studies Assessing the Role of Calcium Hydroxylapatite in Aesthetic Enhancements and Satisfaction
Source: PubMed Central journal article supplement — Plast Reconstr Surg Glob Open. 2024 Dec 26;12(12):e6400. doi: 10.1097/GOX.0000000000006400 (PMC11671094; doi:10.1097/gox.0000000000006400), 2024-12-26
Supplement: gox-12-e6400-s001.pdf [file gox-12-e6400-s001.pdf]

**SDC1.** Search strategies.

| <b>Database</b>       | <b>Strategy</b>                                                                                                                                                                                                                          |
|-----------------------|------------------------------------------------------------------------------------------------------------------------------------------------------------------------------------------------------------------------------------------|
| <b>Embase</b>         | ((radiesse OR CaHA OR calcium-hydroxyapatit* OR calcium-hydroxylapatit*):ab,ti,kw) NOT ((Conference Abstract]/lim OR 'letter'/de OR 'note'/de OR 'review'/exp OR (systematic-review* OR meta-analys* OR metaanalys*):ti)                 |
| <b>Medline</b>        | ((radiesse OR CaHA OR calcium-hydroxyapatit* OR calcium-hydroxylapatit*):ab,ti,kf.) NOT ((news OR congress* OR abstract* OR book* OR chapter* OR dissertation abstract*).pt. OR (systematic-review* OR meta-analys* OR metaanalys*).ti.) |
| <b>Web of Science</b> | TS=((radiesse OR CaHA OR calcium-hydroxyapatit* OR calcium-hydroxylapatit*)) <b>NOT</b> TI=((systematic-review* OR meta-analys* OR metaanalys*)) <b>AND</b> DT=(Article OR Review OR Letter OR Early Access)                             |
| <b>Cochrane</b>       | ((radiesse OR CaHA OR calcium-hydroxyapatit* OR calcium-hydroxylapatit*):ab,ti,kw) NOT ((systematic-review* OR meta-analys* OR metaanalys*):ti)                                                                                          |
| <b>Google Scholar</b> | radiesse CaHA "calcium hydroxyapatite" "calcium hydroxylapatite" - orbital patulous Eustachian vocal dental teeth tooth voice osteoporose  osteomyelitis bone scars                                                                      |
