# Supplementary material for: A Systematic Review and Meta-analysis of Single-group Studies Assessing the Role of Calcium Hydroxylapatite in Aesthetic Enhancements and Satisfaction
Source: PubMed Central journal article supplement — Plast Reconstr Surg Glob Open. 2024 Dec 26;12(12):e6400. doi: 10.1097/GOX.0000000000006400 (PMC11671094; doi:10.1097/gox.0000000000006400), 2024-12-26
Supplement: gox-12-e6400-s002.pdf [file gox-12-e6400-s002.pdf]

**SDC2.** Characteristics of the included studies.

| Study characteristics                |           |          |               |                  | Participants' characteristics                                              |          |                  | Exposure/Intervention                                                  |                                                                        | Outcomes                                                                                                                                                                                                                                                                                                            |
|--------------------------------------|-----------|----------|---------------|------------------|----------------------------------------------------------------------------|----------|------------------|------------------------------------------------------------------------|------------------------------------------------------------------------|---------------------------------------------------------------------------------------------------------------------------------------------------------------------------------------------------------------------------------------------------------------------------------------------------------------------|
| Author, year                         | Country   | Design   | Follow-up     | No. Participants | Characteristics                                                            | Sex (%F) | Age <sup>1</sup> | Injected area                                                          | CaHA brand, Dosage (mean)                                              | Outcomes (assessment methods)                                                                                                                                                                                                                                                                                       |
| <b>Facial</b>                        |           |          |               |                  |                                                                            |          |                  |                                                                        |                                                                        |                                                                                                                                                                                                                                                                                                                     |
| <b>Pavicic, 2022</b> <sup>5</sup>    | Germany   | Pre/post | 12-16w        | 207              | Moderate to severe facial volume deficit                                   | B (96.6) | 54.1±10.12       | NLFs, marionette lines, and/or cheeks                                  | Radiesse(+), 1.77-2.23 mL                                              | - Investigators Nasolabial Folds improvement, MNLFS.<br>- Investigators Marionette Lines improvement, MMLS.<br>- Investigators Upper Cheek Fullness improvement, MUCFS.<br>- Investigators Global Aesthetic Improvement, GAIS.<br>- Patients Global Aesthetic Improvement, GAIS.<br>- Patient satisfaction, FACE-Q. |
| <b>Tzikas, 2004</b> <sup>50</sup>    | US        | Pre/post | 6m            | 90               | Healthy people that could benefit from treatment                           | B (94)   | 25-85            | NLFs, Upper/lower lip, Glabella region, Prejowl area, Marionette lines | Radianse FN, 142 mL for 90 patients                                    | - Patient satisfaction, a 4-point scale.                                                                                                                                                                                                                                                                            |
| <b>Barbarino, 2021</b> <sup>35</sup> | US        | Pre/post | 30d           | 10               | A grade of at least 2 on the validated ATHS                                | B (80)   | 32-68            | Temple area                                                            | Radiesse(+), 1.5 - 4.5 mL                                              | - Investigators Global Aesthetic Improvement, GAIS.<br>- Patient satisfaction, a 5-point scale (5 very satisfied).<br>- Temple hollowing, ATHS.                                                                                                                                                                     |
| <b>Juhász, 2018</b> <sup>12</sup>    | US        | Pre/post | 12m           | 20               | Moderate to severe temporal fossae volume loss based on MTS.               | B (80)   | 63.45            | Temporal fossae at the level of the deep fascial plane                 | Radiesse(+), 1.62±0.57 mL (right temporal fossae); 1.47±0.53 mL (left) | - Investigators Temple volume improvement, MTS.<br>- Patient Global Aesthetic Improvement, GAIS.                                                                                                                                                                                                                    |
| <b>Aletaha, 2017</b> <sup>57</sup>   | Iran      | Pre/post | 19.5m (16-27) | 12               | PESS and small orbital volumes                                             | B (41.6) | 35 (21-72)       | Orbital                                                                | Radiesse, 1.5 mL                                                       | - Sulcus deformity, a 4-point scale (0 as normal).                                                                                                                                                                                                                                                                  |
| <b>Alghoul, 2020</b> <sup>34</sup>   | Jordan    | Pre/post | 3m            | 20               | With signs of volume deflation in the brow and lateral eyelid-cheek areas. | F        | 41 (26-66)       | Lateral periorbital region                                             | Radiesse, 1.88±0.34 mL                                                 | - Investigators Global Aesthetic Improvement, GAIS.<br>- Patient satisfaction, a 5-point Likert scale.                                                                                                                                                                                                              |
| <b>Corduff, 2019</b> <sup>54</sup>   | Australia | Pre/post | 14-16w        | 12               | With tear trough area deformity                                            | NM       | 25-52            | Periorbital                                                            | Radiesse, 0.8 mL                                                       | - Skin thickness, NM.<br>- Aesthetic Improvement, GAIS and TTRS.                                                                                                                                                                                                                                                    |
| <b>Juhász, 2018</b> <sup>56</sup>    | US        | Pre/post | 12m           | 20               | NM                                                                         | B (75)   | 60.2             | Jawline                                                                | Radiesse(+), 1.60±0.52 mL (right side); 1.73±0.68 mL (left side)       | - Jawline volume loss, MJS.<br>- Patient Global Aesthetic Improvement, GAIS.                                                                                                                                                                                                                                        |
| <b>Rokhsar, 2008</b> <sup>43</sup>   | US        | Pre/post | 6m            | 14               | With a history of prior surgical rhinoplasty                               | NM       | NM               | Dorsal nasal surface                                                   | Radiesse, 0.27 mL                                                      | - Patient satisfaction, a 3-point scale (0 as unsatisfied)                                                                                                                                                                                                                                                          |

|                                       |           |          |               |    |                                                                                                                       |          |            |                                                                                           |                                                   |                                                                                                                                                                                                                                                                  |
|---------------------------------------|-----------|----------|---------------|----|-----------------------------------------------------------------------------------------------------------------------|----------|------------|-------------------------------------------------------------------------------------------|---------------------------------------------------|------------------------------------------------------------------------------------------------------------------------------------------------------------------------------------------------------------------------------------------------------------------|
| <b>Stupak, 2007</b> <sup>48</sup>     | US        | Pre/post | 2.5<br>(1-6m) | 13 | Post rhinoplasty or post injury with contour defects judged to be not amenable or not acceptable for revision surgery | NM       | 18-62      | Dorsal nasal surface                                                                      | Radiesse, 0.5-3 mL                                | - Patient satisfaction, a 4-point scale.<br>- Efficacy assessment by physician, NM.                                                                                                                                                                              |
| <b>Becker, 2008</b> <sup>36</sup>     | US        | Pre/post | 26m           | 18 | NM                                                                                                                    | B (NM)   | 28-72      | Nasal bridge, lateral nose, columella, nasal tip                                          | Radiesse, 0.25-1.3 mL                             | - Patient satisfaction, a 10-point scale (0 as extremely dissatisfied)                                                                                                                                                                                           |
| <b>Tanaka, 2014</b> <sup>49</sup>     | Japan     | Pre/post | 7d            | 40 | NM                                                                                                                    | B (95)   | 39.6±10.6  | Anterior nasal spine                                                                      | Radiesse, NM                                      | - Patient satisfaction, a 5-point scale (0 as worse)                                                                                                                                                                                                             |
| <b>Silvers, 2006</b> <sup>46</sup>    | US        | Pre/post | 12-18m        | 98 | HIV/facial lipoatrophy grade 2, 3, 4 on Facial Lipoatrophy Severity Scale                                             | B (6)    | NM         | Cheek area (usually the sub malar region)                                                 | Radiesse, 8.4±3.6 mL                              | - Patient Global Aesthetic Improvement, GAIS.<br>- Patient satisfaction, Yes/No question.<br>- Skin thickness, caliper.                                                                                                                                          |
| <b>Carruthers, 2008</b> <sup>53</sup> | Canada    | Pre/post | 12m           | 29 | HIV/facial lipoatrophy grade 2, 3, 4 on the Carruthers Facial Lipoatrophy Severity Scale                              | B (3.3)  | 51         | Sub malar region (extended to malar eminence and zygoma)                                  | Radiesse, 9.5 mL (5.2-17)                         | - Patient Global Aesthetic Improvement, GAIS.<br>- Skin thickness, caliper.                                                                                                                                                                                      |
| <b>Muti, 2019</b> <sup>13</sup>       | Italy     | Pre/post | 120d          | 25 | With age related volume loss                                                                                          | F        | 52.3       | Cheeks, marionette lines, prejowl sulcus, jawline                                         | Radiesse(+), 1.7 mL (1-3)                         | - Doctors Aesthetic improvement, Merz Aesthetics Scale.<br>- Patients Aesthetic improvement, GICS.                                                                                                                                                               |
| <b>Jacovella, 2005</b> <sup>40</sup>  | Argentina | Pre/post | 18m           | 40 | Healthy                                                                                                               | B (87.5) | 25-60      | Glabellar wrinkles, NLFs, lips, nose, infraorbital areal                                  | Radiance FN, 0.75 mL (range 0.5-2)                | - Patient satisfaction, a 3-point scale.                                                                                                                                                                                                                         |
| <b>Beer, 2008</b> <sup>37</sup>       | US        | Pre/post | 6m            | 16 | With signs of mid face volume loss                                                                                    | F        | 40-75      | Malar area                                                                                | Radiesse, 1.13 mL (per side, range 0.65- 3.1)     | - Patient satisfaction, a 4-point scale.<br>- Investigators aesthetic rating, a 4-point scale.<br>- Patient Global Aesthetic Improvement, GAIS.<br>- Investigators Global Aesthetic Improvement, GAIS.                                                           |
| <b>Dayan, 2008</b> <sup>55</sup>      | US        | Pre/post | 12m           | 20 | NM                                                                                                                    | F        | 56 (46-72) | lower one third of face (NLFs, prejowl sulcus, oral commissure grooves, marionette lines) | Radiesse, 4.9 cm <sup>3</sup> (3.2-6.5)           | - Physicians severity of wrinkles, Dayan Severity Scale<br>- Patient Global Aesthetic Improvement, GAIS.<br>- Investigators Global Aesthetic Improvement, GAIS.                                                                                                  |
| <b>Rauso, 2013</b> <sup>42</sup>      | Italy     | Pre/post | 3m            | 18 | With HIV receiving antiretroviral therapy                                                                             | NM       | ≥18        | NM                                                                                        | Radiesse, NM                                      | - Patient satisfaction, NM.                                                                                                                                                                                                                                      |
| <b>Baspeyras, 2017</b> <sup>51</sup>  | France    | Pre/post | 360d          | 35 | healthy individuals who required jawline contouring                                                                   | F        | 57         | Mandibular angle, prejowl sulcus, posterior cheek vector, cheek bone                      | Radiesse, 5.18 mL                                 | - Investigators aesthetic improvement score for jawline contour, MJS.<br>- Investigators aesthetic improvement score for marionette lines, MMLS.<br>- Patient Aesthetic Improvement, a 5-point scale.<br>- Investigators Aesthetic Improvement, a 5-point scale. |
| <b>Roy, 2006</b> <sup>44</sup>        | US        | Pre/post | 3m            | 60 | Patients requesting facial soft tissue augmentation                                                                   | B (96)   | NM         | Melolabial folds and lips                                                                 | Radiesse, 0.29 mL (Per side of melolabial folds); | - Patient satisfaction, a 5-point scale.<br>- Investigator satisfaction, a 5-point scale.                                                                                                                                                                        |

|                                       |         |                              |         |                       |                                                            |           |                                |                                                                                                                                                                                                                           |                                                                |                                                                                                                                                                                                                                                                                             |
|---------------------------------------|---------|------------------------------|---------|-----------------------|------------------------------------------------------------|-----------|--------------------------------|---------------------------------------------------------------------------------------------------------------------------------------------------------------------------------------------------------------------------|----------------------------------------------------------------|---------------------------------------------------------------------------------------------------------------------------------------------------------------------------------------------------------------------------------------------------------------------------------------------|
|                                       |         |                              |         |                       |                                                            |           |                                |                                                                                                                                                                                                                           | 0.37 mL (upper lip), 0.34 mL (lower lip)                       |                                                                                                                                                                                                                                                                                             |
| <b>Sadick, 2007</b> <sup>45</sup>     | US      | Pre/post                     | 6m      | 41                    | With a facial soft tissue deficiency amenable to treatment | B (88.5)  | 26-78                          | NLFs, lips, perioral lines, Cheeks, tear trough depression, pre jowl sulcus                                                                                                                                               | Radiesse, 1-2 mL                                               | - Patient satisfaction, a 5-point scale (1 as unsatisfied).<br>- Investigator satisfaction, a 5-point scale (1 as unsatisfied).                                                                                                                                                             |
| <b>Fakhre, 2009</b> <sup>38</sup>     | NM      | Observational, Retrospective | NM      | 28                    | NM                                                         | NM        | NM                             | NLFs                                                                                                                                                                                                                      | Radiesse, 0.25-0.65 mL (per NLFs)                              | - Patient satisfaction, a 5-point scoring system (5 as the highest level satisfaction).                                                                                                                                                                                                     |
| <b>Sklar, 2004</b> <sup>47</sup>      | US      | Observational, Not clear     | 6m      | 64                    | NM                                                         | NM        | NM                             | NLFs, tear trough, lips, infraoral, cheeks, mental crease, above upper lip, buccal region                                                                                                                                 | Radianse FN, 0.15-0.91 mL                                      | - Patient and Investigator satisfaction, NM.                                                                                                                                                                                                                                                |
| <b>Vagefi, 2011</b> <sup>4</sup>      | NM      | Observational, Retrospective | 46w     | 15                    | Postenucleation/evisceration socket syndrome               | B (53.3)  | 42                             | Orbital                                                                                                                                                                                                                   | Radiesse, 1.3-2.6 mL                                           | - Relative enophthalmos measurement, Hertel exophthalmometry.<br>- Patients Clinical and aesthetic improvement, NM.                                                                                                                                                                         |
| <b>Bernardini, 2014</b> <sup>52</sup> | Italy   | Observational, Retrospective | 1m      | 63 (Pairs of eyelids) | NM                                                         | B (92)    | 42 (18-57)                     | Tear trough area                                                                                                                                                                                                          | Radiesse (+), 1 mL (mixture with lidocaine per injection site) | - Patient and Investigator aesthetic improvement, a 3-point scale.                                                                                                                                                                                                                          |
| <b>Hevia, 2009</b> <sup>39</sup>      | US      | Observational, Retrospective | NM      | 301                   | NM                                                         | B (92)    | Males: 25-70<br>Females: 28-82 | Under the eyes (malar crease, the nasojugal folds, and the tear trough, which constitute the infraorbital groove)                                                                                                         | Radiesse, Less than 0.6 mL (For both eyes)                     | - Patients satisfaction, NM.<br>- Investigator improvement assessment, NM.                                                                                                                                                                                                                  |
| <b>Wollina, 2020</b> <sup>11</sup>    | Germany | Observational, Not clear     | 36m     | 40                    | NM                                                         | F         | 63±13.4                        | Cheeks, tear troughs, jawline, Marionette lines                                                                                                                                                                           | Radiesse, 3 mL                                                 | - Investigators Global Aesthetic Improvement, GAIS.<br>- Patient Global Aesthetic Improvement, GAIS.                                                                                                                                                                                        |
| <b>Kim, 2018</b> <sup>8</sup>         | Korea   | Observational, Retrospective | NM      | 218                   | NM                                                         | B (85.09) | 34.7 (18-48)                   | Forehead                                                                                                                                                                                                                  | Radiesse, 1.5-3 mL                                             | - Effectiveness on Forehead (Investigator), NM.<br>- Patient satisfaction, NM.                                                                                                                                                                                                              |
| <b>Jansen, 2006</b> <sup>41</sup>     | US      | Observational, Retrospective | 24m     | 112                   | NM                                                         | B (89.5)  |                                | NLF, lips, Radial lip lines, Corner of mouth, Marionette lines, Glabellar lines, Cheek/chin lines, Acne scars, Scar deformities, Facial depression (HIV lipoatrophy), Cheek augmentation, Nasal depressions, Tear troughs | Radiesse, 0.12 - 0.62 mL (For different areas)                 | - Patient satisfaction, a 5-point scale (1 as least satisfied).                                                                                                                                                                                                                             |
| <b>Rovatti, 2020</b> <sup>7</sup>     | Italy   | Observational, Retrospective | 4m      | 40                    | NM                                                         | B (92.5)  | 57.1±9.3                       | Mid and lower face (upper cheek fullness, NLFs, marionette lines, oral commissures, jawline)                                                                                                                              | Radiesse, 1.5 mL of hyper diluted CaHA                         | - Investigator Severity Scores for Mid and Lower Face Scales, 5 validated scales for skin aging of the mid and lower face (upper cheek fullness, NLFs at rest, marionette lines at rest, oral commissures at rest, and jawline at rest scales).<br>- Patient satisfaction, a 3-point scale. |
| <b>Di Maria, 2024</b> <sup>58</sup>   | Italy   | Observational, Not clear     | 219±18m | 31                    | With post enucleation socket syndrome.                     | B (19.35) | 44±14.8                        | Orbital area                                                                                                                                                                                                              | NM, 2.35 ± 0.52 mL (range, 1.3–2.6)                            | - Orbital volume, a Hertel exophthalmometer with the ocular prosthesis in place.                                                                                                                                                                                                            |

|                                        |                                                  |          |      |    |                                                                                 |          |              |                                     |                                                                                  | - Improvement, NM.                                                                                                                                                                                    |
|----------------------------------------|--------------------------------------------------|----------|------|----|---------------------------------------------------------------------------------|----------|--------------|-------------------------------------|----------------------------------------------------------------------------------|-------------------------------------------------------------------------------------------------------------------------------------------------------------------------------------------------------|
|                                        |                                                  |          |      |    |                                                                                 |          |              |                                     |                                                                                  | <u>Hand</u>                                                                                                                                                                                           |
| <b>Kim, 2021</b> <sup>21</sup>         | Korea                                            | Pre/post | 3m   | 20 | NM                                                                              | F        | 42.5 (29-60) | Hand                                | Radiesse, 1.5 mL (per hand)                                                      | - Hand grading, MHGS.                                                                                                                                                                                 |
| <b>Sadick, 2011</b> <sup>22</sup>      | US                                               | Pre/post | 52w  | 10 | Wrinkle severity score of at least 3                                            | F        | 45-65        | Hand                                | Radiesse, 1.3 mL (per hand)                                                      | - Wrinkle severity, a 5-point scale (0 as no wrinkle).<br>- Patients satisfaction, a 5-point scale.                                                                                                   |
| <b>Haq, 2010</b> <sup>19</sup>         | France, Germany, Belgium, Netherlands, Spain, UK | Pre/post | 12w  | 62 | Presented with treatable volume loss on hands                                   | B (98.3) | ≥18          | Thinning tissue of aging hand       | Radiesse, 0.80-5.20 mL (both hands)                                              | - Investigators Global Aesthetic Improvement, GAIS.<br>- Investigator satisfaction, a 6-point scale.<br>- Patient satisfaction, a 6-point scale.                                                      |
| <b>Adel, 2023</b> <sup>59</sup>        | Egypt                                            | Pre/post | 6m   | 40 | With grade 4 according to the five-point hand grading scale.                    | F        | NM           | Hand                                | Radiesse, 0.5 mL + 0.5 mL diluted with a 1.5 mL saline (per hand, 3 sessions)    | - Patient satisfaction, a 5-point scale.                                                                                                                                                              |
|                                        |                                                  |          |      |    |                                                                                 |          |              |                                     |                                                                                  | <u>Abdomen/Upper arm</u>                                                                                                                                                                              |
| <b>Lapatina, 2017</b> <sup>61</sup>    | Russia                                           | Pre/post | 70d  | 10 | With skin laxity of the anterior abdominal wall                                 | F        | 27-53        | Abdomen                             | Radiesse, 0.8 mL                                                                 | - Dermal thickness, ultrasound scans.<br>- Patients Global Aesthetic improvement, GAIS.                                                                                                               |
| <b>Lapatina, 2017</b> <sup>61</sup>    | Russia                                           | Pre/post | 3m   | 10 | Mild to moderate skin laxity                                                    | F        | 41-61        | Upper arm                           | Radiesse, 1.5 mL                                                                 | - Skin elasticity, Cutometer.<br>- Patient Global Aesthetic improvement, GAIS.<br>- Investigator Global Aesthetic improvement, GAIS.                                                                  |
| <b>Wasylkowski, 2015</b> <sup>62</sup> | Spain                                            | Pre/post | 5w   | 12 | With self-evaluated flaccidity scores 3 on a 6-point scale (0 as no flaccidity) | F        | 28-67        | Thigh, hemiabdomen or brachial zone | Radiesse, 3 mL (per thigh), 1.5 mL (per hemiabdomen), 1.5 mL (per brachial zone) | - Skin flaccidity, Cutometer.<br>- Skin flaccidity (Subjects rated), a 6-point scale.<br>- Skin density, Ultra scan.<br>- Skin thickness, Ultra scan.                                                 |
| <b>Amselem, 2016</b> <sup>60</sup>     | Spain                                            | Pre/post | 4m   | 30 | Healthy women wanting to improve aesthetic appearance of their arms.            | F        | 45-65        | Upper arm                           | Radiesse, NM                                                                     | - Investigator satisfaction, Global satisfaction score (1 as very dissatisfied).<br>- Skin flaccidity, a 10-point visual analog scale (0 as very bad).<br>- Volume, a 10-point scale (0 as very bad). |
|                                        |                                                  |          |      |    |                                                                                 |          |              |                                     |                                                                                  | <u>Neck/ Chest/ Décolletage</u>                                                                                                                                                                       |
| <b>Guida, 2021</b> <sup>64</sup>       | Italy                                            | Pre/post | 3m   | 20 | Score of ≥1, according to NSL                                                   | B (90)   | 55±5.8       | Neck                                | NM, NM                                                                           | - Neck skin laxity severity, 5-point validated NSL scale.<br>- Patient satisfaction, 5-point scale (0 as very unsatisfied).                                                                           |
| <b>Fabi, 2021</b> <sup>63</sup>        | US                                               | Pre/post | 360d | 16 | Moderate to severe skin laxity of the chest (grade of 2 or greater on the MDS)  | F        | 61±8.9       | Chest wrinkle/ Décolletage          | Radiesse, 1.5 mL                                                                 | - Chest wrinkle appearance, MDS (Dynamic and at rest).<br>- Patient satisfaction, 7-point scale (0 as completely dissatisfied).                                                                       |

|                                         |        |                              |      |                    |                                                                              |   |            |                      |                                  |                                                                                                                                                                                                                                                                                                                                 |
|-----------------------------------------|--------|------------------------------|------|--------------------|------------------------------------------------------------------------------|---|------------|----------------------|----------------------------------|---------------------------------------------------------------------------------------------------------------------------------------------------------------------------------------------------------------------------------------------------------------------------------------------------------------------------------|
| <b>Yutskovskaya, 2017</b> <sup>65</sup> | Russia | Pre/post                     | 7m   | 20                 | Skin laxity in the neck and Décolletage                                      | F | 35-45      | Neck and Décolletage | Merz (Diluted CaHA), NM          | <ul style="list-style-type: none"> <li>- Skin elasticity, Cutometer.</li> <li>- Skin viscoelasticity, Cutometer.</li> <li>- Dermal Thickness, Ultrasound imaging.</li> <li>- Investigators Global Aesthetic Improvement, GAIS.</li> <li>- Patients Global Aesthetic Improvement, GAIS.</li> </ul>                               |
| <b>De Almeida, 2023</b> <sup>66</sup>   | Brazil | Pre/post                     | 120d | 22                 | with mild or moderate horizontal neck lines and mild or moderate neck laxity | F | 43.5±5.6   | Neck                 | Radiesse, 1.5 mL                 | <ul style="list-style-type: none"> <li>- Horizontal necklines and Neck Laxity, Merz horizontal necklines scale.</li> <li>- Dermal thickness, Ultrasound.</li> <li>- Patients Global Aesthetic Improvement, GAIS.</li> <li>- Patient satisfaction, 4-point scale (Unsatisfied, neutral, satisfied, very satisfied)</li> </ul>    |
| <b><u>Knee / Foot / Buttocks</u></b>    |        |                              |      |                    |                                                                              |   |            |                      |                                  |                                                                                                                                                                                                                                                                                                                                 |
| <b>Guida, 2020</b> <sup>67</sup>        | NM     | Observational, Retrospective | 3m   | 20 (pairs of knee) | NM                                                                           | F | 50±7       | Area above the knee  | Merz (Hyperdiluted CaHA), 1.5 mL | <ul style="list-style-type: none"> <li>- Knee cellulite severity score, KCSS.</li> <li>- Patient satisfaction, 3-point scale.</li> </ul>                                                                                                                                                                                        |
| <b>Custozzo, 2020</b> <sup>68</sup>     | Brazil | Observational, Retrospective | 3m   | 53                 | Healthy                                                                      | F | 64.1±8.3   | Dorsum of foot       | Radiesse, 1.60±0.49 mL per foot  | <ul style="list-style-type: none"> <li>- Patient Global Aesthetic Improvement, GAIS.</li> <li>- Thickness, Ultrasound imaging.</li> </ul>                                                                                                                                                                                       |
| <b>Durariaj, 2024</b> <sup>69</sup>     | US     | Pre/post                     | 14w  | 24                 | Healthy                                                                      | F | 35.54±6.63 | Buttocks             | Radiesse, 1.5 mL (3 sessions)    | <ul style="list-style-type: none"> <li>- Cellulite severity, Cellulite severity score.</li> <li>- Investigators Global Aesthetic Improvement, GAIS.</li> <li>- Patients Global Aesthetic Improvement, GAIS.</li> <li>- Number of visible dimples and dimple depth- Investigators, Visual analysis of 3D photographs.</li> </ul> |

<sup>1</sup>Age is reported either in mean (min, max) or min-max, or mean ± SD.

M: Males; F: females; B: Both; NM: Not mentioned; PESS: Post-enucleation socket syndrome; NLFs: Nasolabial folds; GAIS: Global Aesthetic Improvement Scale; AHS: Allergan Temple Hollowing Scale; MNLFS: Merz Nasolabial Folds Scale; MMLS: Merz Marionette Lines Scale; MUCFS: Merz Upper Cheek Fullness Scale; MJS: Merz Jawline Scale; MHGS: Merz Hand Grading Scale; NSL: Neck skin laxity scale; MDS: Merz Décolletage Scale; KCSS: Knee cellulite severity score; MTS: Merz Validated Temple Scale Assessment volume loss; GICS: Global impression of change; TTRS: Tear Trough Rating Scales.
