# Supplementary material for: A Systematic Review and Meta-analysis of Single-group Studies Assessing the Role of Calcium Hydroxylapatite in Aesthetic Enhancements and Satisfaction
Source: PubMed Central journal article supplement — Plast Reconstr Surg Glob Open. 2024 Dec 26;12(12):e6400. doi: 10.1097/GOX.0000000000006400 (PMC11671094; doi:10.1097/gox.0000000000006400), 2024-12-26
Supplement: gox-12-e6400-s003.pdf [file gox-12-e6400-s003.pdf]

SDC3. Summary of findings of the included studies.

| Author, year                  | Injected area                                                           | Results                                                                                                                                                                                                                                                                                                                                                                                                                                                                                                                                                                                                                                                                                                                                                                                                                                                                                                                                                                                                                                                                                                                                                                                                                                                         |
|-------------------------------|-------------------------------------------------------------------------|-----------------------------------------------------------------------------------------------------------------------------------------------------------------------------------------------------------------------------------------------------------------------------------------------------------------------------------------------------------------------------------------------------------------------------------------------------------------------------------------------------------------------------------------------------------------------------------------------------------------------------------------------------------------------------------------------------------------------------------------------------------------------------------------------------------------------------------------------------------------------------------------------------------------------------------------------------------------------------------------------------------------------------------------------------------------------------------------------------------------------------------------------------------------------------------------------------------------------------------------------------------------|
| <b>Facial</b>                 |                                                                         |                                                                                                                                                                                                                                                                                                                                                                                                                                                                                                                                                                                                                                                                                                                                                                                                                                                                                                                                                                                                                                                                                                                                                                                                                                                                 |
| Pavicic, 2022 <sup>5</sup>    | NLFs, marionette lines, and/or cheeks                                   | <p><b>Investigators Nasolabial Folds improvement:</b><br/>Post-CaHA: Above the pre-defined 60% rate (p&lt;0.0001).</p> <p><b>Investigators Marionette Lines improvement:</b><br/>Post-CaHA: Above the pre-defined 60% rate (p&lt;0.0001).</p> <p><b>Investigators Upper Cheek Fullness improvement:</b><br/>Post-CaHA: Above the pre-defined 60% rate (p&lt;0.0001).</p> <p><b>Investigators Global Aesthetic Improvement:</b> 96.5% of subjects were improved</p> <p><b>Patients Global Aesthetic Improvement:</b> 93.5% of patients reported the improvement.</p> <p><b>Patients satisfaction:</b></p> <ul style="list-style-type: none"> <li>• <i>Pre-CaHA (Mean Rasch-Transformed Score per FACE-Q Module):</i> <ul style="list-style-type: none"> <li>• Satisfaction with facial appearance: 37.8</li> <li>• Satisfaction with cheeks: 40.6</li> <li>• Appraisal of marionette lines: 37.8</li> <li>• Appraisal of NLF: 68.7</li> </ul> </li> <li>• <i>Post-CaHA (Mean Rasch-Transformed Score per FACE-Q Module)::</i> <ul style="list-style-type: none"> <li>• Satisfaction with facial appearance: 56.1</li> <li>• Satisfaction with cheeks: 66.3</li> <li>• Appraisal of marionette lines: 67</li> <li>• Appraisal of NLF: 68.7</li> </ul> </li> </ul> |
| Tzikas, 2004 <sup>50</sup>    | NLFs, Upper/lower lip, Glabella region, Prejowl area, Marionette lines. | <b>Patients satisfaction:</b> 47% of patients reported as excellent satisfaction, 41% good, 6% fair, 2% poor, 3% NA.                                                                                                                                                                                                                                                                                                                                                                                                                                                                                                                                                                                                                                                                                                                                                                                                                                                                                                                                                                                                                                                                                                                                            |
| Barbarino, 2021 <sup>35</sup> | Temple area                                                             | <p><b>Investigators Global Aesthetic Improvement:</b> 80% of patients very much improved and 20% much improved.</p> <p><b>Patients satisfaction:</b> 6 subjects were extremely satisfied, 3 were very satisfied, and 1 was satisfied.</p> <p><b>Temple Hollowing Scale:</b></p> <ul style="list-style-type: none"> <li>• <i>Pre-CaHA:</i> 3 subjects were rated as grade 2, 5 as grade 3, and 2 as grade 4.</li> <li>• <i>Post-CaHA:</i> 9 were rated as grade 1 indicating a flat temple with no depression, and one subject who was rated grade 4 before treatment had improved to grade 2.</li> </ul>                                                                                                                                                                                                                                                                                                                                                                                                                                                                                                                                                                                                                                                        |
| Juhász, 2018 <sup>12</sup>    | Temporal fossae at the level of the deep fascial plane                  | <p><b>Investigators Temple volume improvement:</b></p> <ul style="list-style-type: none"> <li>• <i>Pre-CaHA (Mean):</i> 2.7</li> <li>• <i>Post-CaHA (Mean):</i> 1.5.</li> </ul>                                                                                                                                                                                                                                                                                                                                                                                                                                                                                                                                                                                                                                                                                                                                                                                                                                                                                                                                                                                                                                                                                 |

|                                       |                                                          |                                                                                                                                                                                                                                                                                                                                                                                                                                         |
|---------------------------------------|----------------------------------------------------------|-----------------------------------------------------------------------------------------------------------------------------------------------------------------------------------------------------------------------------------------------------------------------------------------------------------------------------------------------------------------------------------------------------------------------------------------|
|                                       |                                                          | <b>Patients Global Aesthetic Improvement:</b> Patients reported that their global aesthetic improved moderately with injection into the temporal fossae.                                                                                                                                                                                                                                                                                |
| <b>Aletaha, 2017</b> <sup>57</sup>    | Orbit                                                    | <b>Sulcus deformity:</b> The grading of deep superior sulcus deformity showed an improvement of 0.83 (range, 0-2 grades) (p= 0.004) from preoperative to postoperative status.                                                                                                                                                                                                                                                          |
| <b>Alghoul, 2020</b> <sup>34</sup>    | Lateral periorbital region                               | <b>Investigators Global Aesthetic Improvement:</b><br><ul style="list-style-type: none"> <li>• <i>Post-CaHA</i>: 4 ± 0.63 corresponding to much improved.</li> </ul> <b>Patients satisfaction:</b> 6 of 20 were satisfied and 14 were very satisfied.                                                                                                                                                                                   |
| <b>Corduff, 2019</b> <sup>54</sup>    | Periorbital                                              | <b>Skin thickness:</b> Improvements in hyperpigmentation and skin tone, thickness, and color were visible in the treated areas at 14–16 weeks.<br><b>Aesthetic Improvement:</b> GAIS and modified TTRS scores showed that all patients experienced satisfactory post treatment improvements.                                                                                                                                            |
| <b>Juhász, 2018</b> <sup>56</sup>     | Jawline                                                  | <b>Jawline volume loss:</b><br><ul style="list-style-type: none"> <li>• <i>Pre-CaHA (Mean)</i>: 2.2 (moderate volume loss).</li> <li>• <i>Post-CaHA (Mean)</i>: 0.7 point improvement with a reported mean assessment of 1.3.</li> <li>• <i>Post vs Pre</i>: p=0.001</li> </ul> <b>Patients Global Aesthetic Improvement:</b> 7 patients reported much improved, 3 moderately improved, 4 minimally, 5 not improved, 1 minimally worse. |
| <b>Rokhsar, 2008</b> <sup>43</sup>    | Dorsal nasal surface                                     | <b>Patients satisfaction:</b> 13 out of 14 (~92%) reported extreme satisfaction.                                                                                                                                                                                                                                                                                                                                                        |
| <b>Stupak, 2007</b> <sup>48</sup>     | Dorsal nasal surface                                     | <b>Patients satisfaction:</b> 62% of patients reported the satisfaction as excellent, 15% good, 8% fair and 8% poor.<br><b>Efficacy assessment by physician:</b> 88% of the injection sites demonstrated improvement (kappa statistics = 0.62).                                                                                                                                                                                         |
| <b>Becker, 2008</b> <sup>36</sup>     | Nasal bridge, lateral nose, columella, nasal tip.        | <b>Patients satisfaction:</b><br><i>Post-CaHA</i> :<br>50% of the patients rated their satisfaction as 10; approximately 78% as 8 or better; approximately 90% as 6 or higher. The mean degrees of satisfaction with the treatment results was 7.9.                                                                                                                                                                                     |
| <b>Tanaka, 2014</b> <sup>49</sup>     | Anterior nasal spine                                     | <b>Patients satisfaction:</b><br><i>Post-CaHA</i> : 90% of the patients were either satisfied or very satisfied. The mean degrees of satisfaction with the treatment results a 5-point scale from 0 to 4 were 3.38 ± 0.81.                                                                                                                                                                                                              |
| <b>Silvers, 2006</b> <sup>46</sup>    | Cheek area (usually the sub malar region)                | <b>Patients Global Aesthetic Improvement:</b> 91% of patients reported as improved (defined as GAIS at least 3) at month 18.<br><b>Patient satisfaction:</b> at month 12, 100% reported the treatment beneficial to them.<br><b>Skin thickness:</b><br><i>Pre-CaHA (Mean)</i> : 4.7mm<br><i>Post-CaHA (Mean, at month 12)</i> : 7.10mm<br><i>Mean change</i> : 2.33<br><i>Post vs Pre</i> : p<0.05                                      |
| <b>Carruthers, 2008</b> <sup>53</sup> | Sub malar region (extended to malar eminence and zygoma) | <b>Patients Global Aesthetic Improvement:</b> 2 (6.9%) patients reported as very much improved, 13 (44.8%) much improved and 14 (48.3%) improved.<br><b>Skin thickness:</b><br><i>Pre-CaHA (Mean±SD)</i> : 5.3±0.8mm<br><i>Post-CaHA (Mean±SD)</i> : 8.8±1.5 mm<br><i>Mean change</i> : 3.5±1.3<br><i>Post vs Pre</i> : p<0.01                                                                                                          |

|                                      |                                                                                            |                                                                                                                                                                                                                                                                                                                                                                                                                                                                                                                                                                                                                                                                                          |
|--------------------------------------|--------------------------------------------------------------------------------------------|------------------------------------------------------------------------------------------------------------------------------------------------------------------------------------------------------------------------------------------------------------------------------------------------------------------------------------------------------------------------------------------------------------------------------------------------------------------------------------------------------------------------------------------------------------------------------------------------------------------------------------------------------------------------------------------|
| <b>Muti, 2019</b> <sup>13</sup>      | 1-3 areas (cheeks, marionette lines, prejowl sulcus, jawline)                              | <b>Doctors Aesthetic improvement:</b><br><i>Post-CaHA (Mean):</i> 1.1<br><b>Patients Aesthetic improvement:</b><br><i>Post-CaHA (Mean):</i> 2.2 (range 1.0 - 3.0).                                                                                                                                                                                                                                                                                                                                                                                                                                                                                                                       |
| <b>Jacovella, 2005</b> <sup>40</sup> | Glabella wrinkles, NLFs, lips, nose, infraorbital areal                                    | <b>Patient satisfaction:</b> 87% of patients reported as very good rating.                                                                                                                                                                                                                                                                                                                                                                                                                                                                                                                                                                                                               |
| <b>Beer, 2008</b> <sup>37</sup>      | Malar area                                                                                 | <b>Patient satisfaction:</b> 5 (31%) of patients reported very satisfied, 7 (44%) satisfied, 3 (19%) no opinion, and 0 dissatisfied.<br><b>Investigators aesthetic rating:</b> Investigators reported 3 (19%) of patients as very much improved, 12 (75%) improved, 1 (<1%) unchanged, 0 worse.<br><b>Patients Global Aesthetic Improvement:</b> 3 (19%) of patients reported as very much improved, 4 (25%) as much improved, 7 (44%) as improved, 2 (13%) as no change, 0 worse.<br><b>Investigators Global Aesthetic Improvement:</b> Investigators reported 2 (13%) of patients as very much improved, 7 (44%) as much improved, 6 (38%) as improved, 1 (<1%) as no change, 0 worse. |
| <b>Dayan, 2008</b> <sup>55</sup>     | lower one third of face (NLFs, prejowl sulcus, oral commissure grooves, marionette lines)  | <b>Physicians severity of wrinkles:</b><br><i>Pre-CaHA (Mean):</i> ~ 4.2<br><i>Post-CaHA (Mean):</i> ~ 3.1<br>Wrinkle severity scores demonstrated marked improvement at 2 weeks after optimal treatment and remained improved throughout the 1 year of follow-up.<br><b>Patients Global Aesthetic Improvement:</b> 77% of patients reported at least improved.<br><b>Investigators Global Aesthetic Improvement:</b> Investigators reported 48% of patients at least improved.                                                                                                                                                                                                          |
| <b>Rauso, 2013</b> <sup>42</sup>     | NM                                                                                         | <b>Patient satisfaction:</b> High patients satisfaction was achieved in all cases.                                                                                                                                                                                                                                                                                                                                                                                                                                                                                                                                                                                                       |
| <b>Baspeyras, 2017</b> <sup>51</sup> | Mandibular angle, prejowl sulcus, posterior cheek vector, cheek bone                       | <b>Investigators Aesthetic improvement score for jawline contour:</b><br><i>Pre-CaHA (Mean):</i> 2.42<br><i>Post-CaHA (Mean):</i> 1.45<br><i>Post vs Pre:</i> p= 0.0015<br><b>Investigators Aesthetic improvement score for marionette lines:</b><br><i>Pre-CaHA:</i> 2.33<br><i>Post-CaHA:</i> 1.50<br><b>Patients Aesthetic Improvement:</b> Over 89% of the subjects rated the esthetic effect as improved to very much improved at every follow-up visit.<br><b>Investigators Aesthetic Improvement:</b> The esthetic effect was rated as improved to very much improved in 81% (among 26 patients) subjects.                                                                        |
| <b>Roy, 2006</b> <sup>44</sup>       | Melolabial folds and lips                                                                  | <b>Patients satisfaction:</b><br><i>Post-CaHA (Mean):</i> 4.6<br><b>Investigator satisfaction:</b><br><i>Post-CaHA (Mean):</i> 4.5                                                                                                                                                                                                                                                                                                                                                                                                                                                                                                                                                       |
| <b>Sadick, 2007</b> <sup>45</sup>    | NLFs, lips, perioral lines, Cheeks, tear trough depression, pre jowl sulcus                | <b>Patient satisfaction:</b><br><i>Post-CaHA (Mean):</i> 4.8<br><b>Investigator satisfaction:</b><br><i>Post-CaHA (Mean):</i> 4.5                                                                                                                                                                                                                                                                                                                                                                                                                                                                                                                                                        |
| <b>Fakhre, 2009</b> <sup>38</sup>    | NLFs                                                                                       | <b>Patients satisfaction:</b> Overall patient satisfaction with Radiesse was 3.7 (range: 1–5) or moderately to very satisfied.                                                                                                                                                                                                                                                                                                                                                                                                                                                                                                                                                           |
| <b>Sklar, 2004</b> <sup>47</sup>     | NLFs, tear trough, lips, infraoral, cheeks, mental crease, above upper lip, buccal region. | <b>Patient and Investigator satisfaction:</b> Patient and physician satisfaction were high.                                                                                                                                                                                                                                                                                                                                                                                                                                                                                                                                                                                              |
| <b>Vagefi, 2011</b> <sup>4</sup>     | Orbital                                                                                    | <b>Relative enophthalmos measurement:</b> 2.4 mm reduction per syringe of filler.                                                                                                                                                                                                                                                                                                                                                                                                                                                                                                                                                                                                        |

|                                       |                                                                                                                                                                                                                           |                                                                                                                                                                                                                                                                                                                                                                                                                                                                                                                                                                                                                                                                                                                                                                     |
|---------------------------------------|---------------------------------------------------------------------------------------------------------------------------------------------------------------------------------------------------------------------------|---------------------------------------------------------------------------------------------------------------------------------------------------------------------------------------------------------------------------------------------------------------------------------------------------------------------------------------------------------------------------------------------------------------------------------------------------------------------------------------------------------------------------------------------------------------------------------------------------------------------------------------------------------------------------------------------------------------------------------------------------------------------|
|                                       |                                                                                                                                                                                                                           | <b>Patients clinical and aesthetic improvement:</b> 87% of patients demonstrated clinical and aesthetic improvement that was observed to continue up to 1.5 years.                                                                                                                                                                                                                                                                                                                                                                                                                                                                                                                                                                                                  |
| <b>Bernardini, 2014</b> <sup>52</sup> | Tear trough area                                                                                                                                                                                                          | <b>Patient and Investigator aesthetic improvement:</b> 92% of patients reported improvement. Investigators reported improvement among 92.5% of patients.                                                                                                                                                                                                                                                                                                                                                                                                                                                                                                                                                                                                            |
| <b>Hevia, 2009</b> <sup>39</sup>      | Under the eyes (malar crease, the nasojugal folds, and the tear trough, which constitute the infraorbital groove)                                                                                                         | <b>Patients satisfaction:</b> Anecdotal comments from the 301 patients were overwhelmingly favorable (Patients expressed satisfaction with the improvements in their infraorbital areas).<br><b>Investigator improvement assessment:</b> As is the case with other areas of the face, improvement in appearance of the infraorbital region tended to be proportional to the severity of the defect.                                                                                                                                                                                                                                                                                                                                                                 |
| <b>Wollina, 2020</b> <sup>11</sup>    | Cheeks, tear troughs, jawline, Marionette lines                                                                                                                                                                           | <b>Investigators Global Aesthetic Improvement:</b><br><i>Post-CaHA:</i> 2.5 ± 0.7 (2 corresponds to minute improvement).<br><b>Patients Global Aesthetic Improvement:</b><br><i>Post-CaHA:</i> 2.4 ± 0.8 (2 corresponds to minute improvement).                                                                                                                                                                                                                                                                                                                                                                                                                                                                                                                     |
| <b>Kim, 2018</b> <sup>8</sup>         | Forehead                                                                                                                                                                                                                  | <b>Effectiveness on Forehead:</b> In all cases, physician analysis of results indicated that tissue indentations were relieved, forehead projections increased, forehead curves were evened out, profiles were balanced, and skin surfaces smoothened.<br><b>Patient satisfaction:</b> Satisfaction rate was 100%.                                                                                                                                                                                                                                                                                                                                                                                                                                                  |
| <b>Jansen, 2006</b> <sup>41</sup>     | NLF, lips, Radial lip lines, Corner of mouth, Marionette lines, Glabellar lines, Cheek/chin lines, Acne scars, Scar deformities, Facial depression (HIV lipoatrophy), Cheek augmentation, Nasal depressions, Tear troughs | <b>Patients satisfaction:</b> 77 (69%) of patients were satisfied, 27 (24%) dissatisfied and 8 (7%) undecided.                                                                                                                                                                                                                                                                                                                                                                                                                                                                                                                                                                                                                                                      |
| <b>Rovatti, 2020</b> <sup>7</sup>     | Mid and lower face (upper cheek fullness, NLFs, marionette lines, oral commissures, jawline)                                                                                                                              | <b>Investigator Severity Scores for Mid and Lower Face Scales (Mean ± SD):</b><br><i>Pre-CaHA (Mean±SD):</i><br>Upper cheek fullness: 2.7 ± 0.6<br>Nasolabial fold at rest: 2.8 ± 0.6<br>Oral commissure at rest: 2.4 ± 0.7<br>Marionette lines at rest: 2.4 ± 0.8<br>Jawline at rest: 2.1 ± 0.7<br><i>Post-CaHA(Mean±SD):</i><br>Upper cheek fullness:0.97 ± 0.4<br>Nasolabial fold at rest: 0.95 ± 0.4<br>Oral commissure at rest: 0.8 ± 0.5<br>Marionette lines at rest:0.7 ± 0.6<br>Jawline at rest:0.8 ± 0.5<br><i>Post vs Pre (Mean±SD):</i><br>Upper cheek fullness:1.7 ± 0.5<br>Nasolabial fold at rest: 1.9 ± 0.4<br>Oral commissure at rest: 1.5 ± 0.6<br>Marionette lines at rest:1.6 ± 0.5<br>Jawline at rest:1.3 ± 0.5<br><i>Post vs Pre:</i> p<0.0001 |
| <b>Di Maria, 2024</b> <sup>58</sup>   | Orbital area                                                                                                                                                                                                              | <b>Patient satisfaction:</b> 87.5% of patients were very satisfied and the other 12.5% were satisfied.<br><b>Orbital volume:</b><br><i>Pre-CaHA:</i> 14.16 ± 2.15 mm<br><i>Post-CaHA(Mean reduction):</i><br>3.35 ± 0.91 (month 6)<br>2.97 ± 1.35 (year 3)<br><i>Post vs Pre:</i> p<0.001                                                                                                                                                                                                                                                                                                                                                                                                                                                                           |

---

**Improvement:** Most patients demonstrated clinical and cosmetic improvement, which was observed to continue for up to 10 years

---

**Hands**

|                                     |                               |                                                                                                                                                                                                                                                                                                                                                                                                                                                                                                                                                                                                                                                                                                                                                                                                                                                                                                                                                                                                                                                                                                                                                                                                                               |
|-------------------------------------|-------------------------------|-------------------------------------------------------------------------------------------------------------------------------------------------------------------------------------------------------------------------------------------------------------------------------------------------------------------------------------------------------------------------------------------------------------------------------------------------------------------------------------------------------------------------------------------------------------------------------------------------------------------------------------------------------------------------------------------------------------------------------------------------------------------------------------------------------------------------------------------------------------------------------------------------------------------------------------------------------------------------------------------------------------------------------------------------------------------------------------------------------------------------------------------------------------------------------------------------------------------------------|
| <b>Kim, 2021</b> <sup>21</sup>      | Hand                          | <b>Hand grading:</b><br><i>Pre-CaHA (Mean±SD): 3±1</i><br><i>Post-CaHA (Mean±SD): 2.5±0.6</i>                                                                                                                                                                                                                                                                                                                                                                                                                                                                                                                                                                                                                                                                                                                                                                                                                                                                                                                                                                                                                                                                                                                                 |
| <b>Sadick, 2011</b> <sup>22</sup>   | Hand                          | <b>Investigators wrinkle severity:</b> <ul style="list-style-type: none"><li>• <i>Pre-CaHA:</i></li><li>• Right hand wrinkles: 20 percent as deep, 50 percent as moderately deep and 30 percent as some wrinkles.</li><li>• Left hand wrinkle: 20 percent of left hand wrinkles as deep, 40 percent as moderately deep and 40 percent as some wrinkles.</li><li>• <i>Post-CaHA:</i> 20 percent of right and left hand wrinkles as moderately deep, 40 percent as some wrinkles and 30 percent as barely perceptible wrinkles.</li></ul> <b>Patients wrinkle severity:</b> <ul style="list-style-type: none"><li>• <i>Pre-CaHA:</i> 20 percent of right and left hand wrinkle severity as deep, 60 percent as moderately deep and 20 percent as some wrinkles.</li><li>• <i>Post-CaHA:</i></li><li>• Right hand wrinkles: 10 percent as deep, 10 percent as moderately deep, 50 percent as some wrinkles and 20 percent as barely perceptible wrinkles.</li><li>• Left hand wrinkles: 10 percent as deep, 20 percent as moderately deep, 40 percent as some wrinkles and 20 percent as barely perceptible wrinkles.</li></ul> <b>Patients satisfaction:</b> 60% of the patients rated their results as satisfactory or better. |
| <b>Haq, 2010</b> <sup>19</sup>      | Thinning tissue of aging hand | <b>Investigators Global Aesthetic Improvement:</b> Physicians evaluated 98% of the patients as improved or better on the GAIS.<br><b>Investigator satisfaction:</b> 93% of physicians reported satisfied or better<br><b>Patients satisfaction:</b> 86% of patients reported satisfied or better.                                                                                                                                                                                                                                                                                                                                                                                                                                                                                                                                                                                                                                                                                                                                                                                                                                                                                                                             |
| <b>Adel, 2023</b> <sup>59</sup>     | Hand                          | <b>Patient satisfaction:</b><br><i>Post-CaHA (Mean±SD): 4.79 ± 0.17</i><br><i>Post vs 14 days after treatment (Mean±SD): 0.18 ± 0.03 (p=0.537)</i>                                                                                                                                                                                                                                                                                                                                                                                                                                                                                                                                                                                                                                                                                                                                                                                                                                                                                                                                                                                                                                                                            |
| <b><u>Abdomen/Upper arm</u></b>     |                               |                                                                                                                                                                                                                                                                                                                                                                                                                                                                                                                                                                                                                                                                                                                                                                                                                                                                                                                                                                                                                                                                                                                                                                                                                               |
| <b>Lapatina, 2017</b> <sup>61</sup> | Abdomen                       | <b>Dermal thickness:</b> Results demonstrated a statistically significant increase in dermal thickness after injection of diluted CaHA at both the center and sides of the abdomen (p≤0.05 for both areas). The improvement was greatest in the area of the umbilicus, where an increase in thickness of 0.7 mm vs 0.4 mm at the sides of the abdomen was noted. Combining measurements from the two abdominal ultrasound scan areas to give a mean dermal thickness, the results showed that treatment with a 1:4 dilution of CaHA resulted in a statistically significant increase in dermal thickness of 26.7% (p≤0.05)<br><b>Patients Global Aesthetic improvement:</b> 70% of patients reported very much improved, 20% much improved, 10% improved.                                                                                                                                                                                                                                                                                                                                                                                                                                                                     |
| <b>Lapatina, 2017</b> <sup>61</sup> | Upper arm                     | <b>Skin elasticity:</b><br><i>Pre-CaHA (Mean): 72 U</i><br><i>Post-CaHA (Mean): 82 U</i><br><i>Post vs Pre: p&lt;0.05</i><br><b>Patients Global Aesthetic improvement:</b> 90% of patients rated themselves as having good to very good improvement and the remaining 10% rated as improved.                                                                                                                                                                                                                                                                                                                                                                                                                                                                                                                                                                                                                                                                                                                                                                                                                                                                                                                                  |

|                                         |                                     |                                                                                                                                                                                                                                                                                                                                                                                                                                                                                                                                                                                                                                                                                                                                                                                                                                                                                                                                                                                                                                                                                                                                                                                                                                                                                                                                                                                                                                                     |
|-----------------------------------------|-------------------------------------|-----------------------------------------------------------------------------------------------------------------------------------------------------------------------------------------------------------------------------------------------------------------------------------------------------------------------------------------------------------------------------------------------------------------------------------------------------------------------------------------------------------------------------------------------------------------------------------------------------------------------------------------------------------------------------------------------------------------------------------------------------------------------------------------------------------------------------------------------------------------------------------------------------------------------------------------------------------------------------------------------------------------------------------------------------------------------------------------------------------------------------------------------------------------------------------------------------------------------------------------------------------------------------------------------------------------------------------------------------------------------------------------------------------------------------------------------------|
|                                         |                                     | <b>Investigators Global Aesthetic improvement:</b> Investigators rated 80% of patients as much improve, 10% very much, 10% improved.                                                                                                                                                                                                                                                                                                                                                                                                                                                                                                                                                                                                                                                                                                                                                                                                                                                                                                                                                                                                                                                                                                                                                                                                                                                                                                                |
| <b>Wasylkowski, 2015</b> <sup>62</sup>  | Thigh, hemiabdomen or brachial zone | <p><b>Skin flaccidity:</b> Across all treatment zones, Cutometer data showed improvements in skin flaccidity vs baseline in 78% of cases at 5 weeks after treatment, most commonly in the thighs (82% of cases). The mean reduction in flaccidity from baseline to 5 weeks after treatment was also calculated, and was 0.0924 mm, 0.0117 mm, and 0.0814 mm for the brachial zone, thighs, and abdomen, respectively. The overall mean reduction in flaccidity from baseline to 5 weeks after treatment was 0.093 mm.</p> <p><b>Skin flaccidity (Subjects rated):</b><br/> <i>Pre-CaHA:</i> Mean subject-assessed flaccidity scores for the thighs, abdomen, and brachial zones were 3.6, 3.7, and 3.8, respectively.<br/> <i>Post-CaHA:</i> Following treatment, subject-assessed flaccidity scores showed an improvement versus baseline in 27 of the 36 treated zones (75%): The mean self-assessed flaccidity score following treatment was 2.6 for the thighs, 2.7 for the abdomen, and 3.0 for the brachial zones.</p> <p><b>Skin density:</b> Improvements in skin density relative to baseline were recorded in the majority of measurements across all treatment zones. The abdomen showed the best treatment response, with improvements versus baseline in 88% of cases.</p> <p><b>Skin thickness:</b> Skin thickness showed improvement versus baseline in the majority of cases, but most frequently in the thighs (88% of cases).</p> |
| <b>Amselem, 2016</b> <sup>60</sup>      | Upper arm                           | <p><b>Investigator satisfaction:</b><br/> <i>Post-CaHA (Mean):</i> 4.6</p> <p><b>Patient satisfaction:</b><br/> <i>Post-CaHA (Mean):</i> 4.53</p> <p><b>Skin flaccidity (Subjects rated):</b><br/> <i>Pre-CaHA (Mean):</i> 2.8<br/> <i>Post-CaHA (Mean):</i> 7.63</p> <p><b>Skin flaccidity (Investigator rated):</b><br/> <i>Pre-CaHA (Mean):</i> 3.5<br/> <i>Post-CaHA (Mean):</i> 7.53</p> <p><b>Volume (Investigator rated):</b><br/> <i>Pre-CaHA (Mean):</i> 3.6<br/> <i>Post-CaHA (Mean):</i> 7.5</p>                                                                                                                                                                                                                                                                                                                                                                                                                                                                                                                                                                                                                                                                                                                                                                                                                                                                                                                                         |
|                                         |                                     | <b><u>Neck/ Chest/ Décolletage</u></b>                                                                                                                                                                                                                                                                                                                                                                                                                                                                                                                                                                                                                                                                                                                                                                                                                                                                                                                                                                                                                                                                                                                                                                                                                                                                                                                                                                                                              |
| <b>Guida, 2021</b> <sup>64</sup>        | Neck                                | <p><b>Neck skin laxity severity:</b></p> <ul style="list-style-type: none"> <li>• <i>Pre-CaHA ( Mean±SD ):</i> 2.3±0.8</li> <li>• <i>Post-CaHA ( Mean±SD ):</i> 1.2±0.5</li> </ul> <p><b>Patients satisfaction:</b> After treatment, 65% of patients were very satisfied and 30% were satisfied, 5% neither satisfied nor dissatisfied.</p>                                                                                                                                                                                                                                                                                                                                                                                                                                                                                                                                                                                                                                                                                                                                                                                                                                                                                                                                                                                                                                                                                                         |
| <b>Fabi, 2021</b> <sup>63</sup>         | Chest wrinkle/ Décolletage          | <p><b>Chest wrinkle appearance</b> (Dynamic and at rest): significant improvement in both dynamic and at rest scores at the end of study compared to baseline (p&lt;0.01).</p> <p><b>Patients satisfaction:</b> a non-significant increase from 3.25±2.0 at day 180 to 3.59±2.1 at day 360. (No comparison with baseline was reported)</p>                                                                                                                                                                                                                                                                                                                                                                                                                                                                                                                                                                                                                                                                                                                                                                                                                                                                                                                                                                                                                                                                                                          |
| <b>Yutskovskaya, 2017</b> <sup>65</sup> | Neck and Décolletage                | <p><b>Skin elasticity:</b><br/> <i>Pre-CaHA (Mean):</i> 0.57<br/> <i>Post-CaHA (Mean):</i> 0.73<br/> <i>Post vs Pre:</i> p&lt;0.00001.</p> <p><b>Skin viscoelasticity:</b><br/> <i>Pre-CaHA (Mean):</i> 0.66<br/> <i>Post-CaHA (Mean):</i> 0.5<br/> <i>Post vs Pre:</i> p&lt;0.05.</p> <p><b>Dermal Thickness:</b></p>                                                                                                                                                                                                                                                                                                                                                                                                                                                                                                                                                                                                                                                                                                                                                                                                                                                                                                                                                                                                                                                                                                                              |

|                                       |                     |                                                                                                                                                                                                                                                                                                                                                                                                                                                                                                                                                                                                                                                                                                                                                                                                                                                                                    |
|---------------------------------------|---------------------|------------------------------------------------------------------------------------------------------------------------------------------------------------------------------------------------------------------------------------------------------------------------------------------------------------------------------------------------------------------------------------------------------------------------------------------------------------------------------------------------------------------------------------------------------------------------------------------------------------------------------------------------------------------------------------------------------------------------------------------------------------------------------------------------------------------------------------------------------------------------------------|
|                                       |                     | <p><i>Pre-CaHA (Mean):</i> 1462.3 mm<br/> <i>Post-CaHA (Mean):</i> 1865.9<br/> <i>Post vs Pre:</i> p&lt;0.0001.</p> <p><b>Investigators Global Aesthetic Improvement:</b><br/> <i>Post-CaHA (Mean):</i> 2.15 ± 0.37<br/> <i>Post vs Pre:</i> indicating much improved compared to baseline.</p> <p><b>Patients Global Aesthetic improvement:</b><br/> <i>Post-CaHA ( Mean±SD):</i> 2.55 ± 0.51<br/> <i>Post vs Pre:</i> indicating much improved compared to baseline.</p>                                                                                                                                                                                                                                                                                                                                                                                                         |
| <b>De Almeida, 2023</b> <sup>66</sup> | Neck                | <p><b>Horizontal necklines:</b> 86.4% (95% CI: 68.3 - 99.9%) decrease by at least 1 point.<br/> <b>Neck Laxity:</b> 81.8% (95% CI: 72.7 - 90.1%) decrease by at least 1 point.<br/> <b>Dermal Thickness:</b> There was an overall time-dependent improvement in dermal thickness (p&lt;0.01). The total dermal thickness increased by 14.9% (95% CI: 8.5–21.3%).<br/> <b>Patients Global Aesthetic Improvement:</b> 90.9% (95% CI: 77.3–99.9%) reported improvement compared to baseline.<br/> <b>Patient satisfaction:</b> 82% of patients were very stratified, 9% satisfied, 4% neutral, and 5% reported worsened results.</p>                                                                                                                                                                                                                                                  |
| <b><u>Knee/ Foot/ Buttocks</u></b>    |                     |                                                                                                                                                                                                                                                                                                                                                                                                                                                                                                                                                                                                                                                                                                                                                                                                                                                                                    |
| <b>Guida, 2020</b> <sup>67</sup>      | Area above the knee | <p><b>Knee cellulite severity score:</b><br/> <i>Pre-CaHA (Mean±SD):</i> 4.9±1.4 (range 2-9)<br/> <i>Post-CaHA (Mean±SD):</i> 1.8±1.5 (range 0-6)<br/> <i>Post vs Pre:</i> p&lt;0.05</p> <p><b>Patients satisfaction:</b> 66.7% of cases were very satisfied and 33.3% satisfied.</p>                                                                                                                                                                                                                                                                                                                                                                                                                                                                                                                                                                                              |
| <b>Custozzo, 2020</b> <sup>68</sup>   | Dorsum of foot      | <p><b>Patients Global Aesthetic Improvement:</b> Graded by the patients as 4, connoting good improvement (range 3 to 5).<br/> <b>Thickness of the layers of the dorsum:</b><br/> <i>Post-CaHA (Mean±SD):</i><br/> Dorsal superficial fatty layer: 0.72±0.12 mm.<br/> Dorsal intermediate fatty layer: 0.60±0.08 mm.<br/> Dorsal deep fatty layer: 2.13 ± 0.28 mm</p>                                                                                                                                                                                                                                                                                                                                                                                                                                                                                                               |
| <b>Durariaj, 2024</b> <sup>69</sup>   | Buttocks            | <p><b>Cellulite severity:</b><br/> <i>Pre-CaHA (Mean±SD):</i> 9.77 ± 2.71 (severe)<br/> <i>Post-CaHA (Mean±SD):</i> 5.48 ± 2.55 (Mild to moderate)<br/> <i>Post vs pre:</i> mean of 4.29 (3.58 – 5.05 ) decreases, p &lt; 0.0001</p> <p><b>Investigators Global Aesthetic Improvement:</b> 20.8% of patients were scored as very much improved, 6.5% as much improved, and 12.5% as improved.<br/> <b>Patients Global Aesthetic Improvement:</b> 20.8% of patients reported very much improvement, 54.2% much improvement, and 16% improvement.</p> <p><b>Number of visible dimples and dimple depth- Investigators:</b><br/> <b>Visible dimples:</b><br/> <i>Pre-CaHA (Mean±SD):</i> 5.56 ± 0.98<br/> <i>Post-CaHA (Mean±SD):</i> 2.56 ± 1.36<br/> <i>Post vs pre:</i> mean of 3 (2.56 - 1.36) decreases, p &lt; 0.0001<br/> <b>Dimple depth:</b> 0.015 mm (50.9%) reduction.</p> |

NLFs: Nasolabial folds; GAIS: Global Aesthetic Improvement Scale; TTRS: Tear Trough Rating Scale.
