# Supplementary material for: A Systematic Review and Meta-analysis of Single-group Studies Assessing the Role of Calcium Hydroxylapatite in Aesthetic Enhancements and Satisfaction
Source: PubMed Central journal article supplement — Plast Reconstr Surg Glob Open. 2024 Dec 26;12(12):e6400. doi: 10.1097/GOX.0000000000006400 (PMC11671094; doi:10.1097/gox.0000000000006400), 2024-12-26
Supplement: gox-12-e6400-s004.pdf [file gox-12-e6400-s004.pdf]

**SDC4.** Risk of bias according to Risk Of Bias In Non-randomized Studies (ROBINS-I).

| Author, year                     | Pre-intervention |                           | At intervention                |                                        | Post-intervention |                         |                                  |
|----------------------------------|------------------|---------------------------|--------------------------------|----------------------------------------|-------------------|-------------------------|----------------------------------|
|                                  | Bias due to/in   |                           | Bias in                        |                                        | Bias due to/in    |                         |                                  |
|                                  | Confounding      | Selection of participants | Classification of intervention | Deviations from intended interventions | Missing data      | Measurement of outcomes | Selection of the reported result |
| Barbarino, 2021 <sup>35</sup>    | Serious risk     | Low risk                  | Low risk                       | Low risk                               | Low risk          | Serious risk            | Low risk                         |
| Pavicic, 2022 <sup>5</sup>       | Serious risk     | Low risk                  | Low risk                       | Serious risk                           | Low risk          | Serious risk            | Low risk                         |
| Kim, 2021 <sup>21</sup>          | Serious risk     | No information            | Low risk                       | Low risk                               | Low risk          | Serious risk            | Low risk                         |
| Guida, 2021 <sup>64</sup>        | Serious risk     | Low risk                  | Low risk                       | Low risk                               | Low risk          | Serious risk            | Low risk                         |
| Fabi, 2021 <sup>63</sup>         | Serious risk     | Low risk                  | Low risk                       | Low risk                               | Low risk          | Serious risk            | Low risk                         |
| Alghoul, 2020 <sup>34</sup>      | Serious risk     | Low risk                  | Low risk                       | Low risk                               | Low risk          | Serious risk            | Low risk                         |
| Lapatina, 2017 <sup>61</sup>     | Serious risk     | Low risk                  | Low risk                       | Low risk                               | Low risk          | No information          | Low risk                         |
| Rauso, 2013 <sup>42</sup>        | Serious risk     | Low risk                  | Serious risk                   | Serious risk                           | Low risk          | Serious risk            | Low risk                         |
| Becker, 2008 <sup>36</sup>       | Serious risk     | Moderate risk             | Low risk                       | Serious risk                           | Low risk          | Serious risk            | Low risk                         |
| Haq, 2010 <sup>19</sup>          | Serious risk     | Low risk                  | Low risk                       | Low risk                               | Low risk          | Serious risk            | Low risk                         |
| Tanaka, 2014 <sup>49</sup>       | Serious risk     | No information            | No information                 | No information                         | Low risk          | Serious risk            | Low risk                         |
| Wasylkowski, 2015 <sup>62</sup>  | Serious risk     | Low risk                  | Low risk                       | Low risk                               | Low risk          | Serious risk            | Low risk                         |
| Juhász, 2018 <sup>12</sup>       | Serious risk     | Low risk                  | Low risk                       | Serious risk                           | Low risk          | Serious risk            | Low risk                         |
| Juhász, 2018 <sup>56</sup>       | Serious risk     | Low risk                  | Low risk                       | Serious risk                           | Low risk          | Serious risk            | Low risk                         |
| Aletaha, 2017 <sup>57</sup>      | Serious risk     | Low risk                  | Low risk                       | Low risk                               | Low risk          | No information          | Low risk                         |
| Sadick, 2011 <sup>22</sup>       | Serious risk     | Low risk                  | Low risk                       | Low risk                               | Low risk          | Serious risk            | Low risk                         |
| Yutskovskaya, 2017 <sup>65</sup> | Serious risk     | Low risk                  | Low risk                       | Low risk                               | Low risk          | Serious risk            | Low risk                         |
| Silvers, 2006 <sup>46</sup>      | Serious risk     | Low risk                  | Low risk                       | Low risk                               | Low risk          | Serious risk            | Low risk                         |
| Carruthers, 2008 <sup>53</sup>   | Serious risk     | Low risk                  | Low risk                       | Low risk                               | Low risk          | Low risk                | Low risk                         |
| Tzikas, 2004 <sup>50</sup>       | Serious risk     | No information            | Serious risk                   | No information                         | Low risk          | Serious risk            | Low risk                         |
| Baspeyras, 2017 <sup>51</sup>    | Serious risk     | No information            | Low risk                       | Low risk                               | Low risk          | Serious risk            | Low risk                         |
| Amselem, 2016 <sup>60</sup>      | Serious risk     | No information            | Low risk                       | Low risk                               | Low risk          | Serious risk            | Low risk                         |

|                                       |              |                |              |                |                |                |                |
|---------------------------------------|--------------|----------------|--------------|----------------|----------------|----------------|----------------|
| <b>Roy, 2006</b> <sup>44</sup>        | Serious risk | No information | Low risk     | Serious risk   | Serious risk   | Serious risk   | Low risk       |
| <b>Muti, 2019</b> <sup>13</sup>       | Serious risk | No information | Low risk     | Low risk       | No information | Serious risk   | Serious risk   |
| <b>Sklar, 2004</b> <sup>47</sup>      | Serious risk | No information | Serious risk | No information | No information | No information | No information |
| <b>Corduff, 2019</b> <sup>54</sup>    | Serious risk | No information | Low risk     | Serious risk   | No information | Serious risk   | Serious risk   |
| <b>Jacovella, 2005</b> <sup>40</sup>  | Serious risk | No information | Serious risk | No information | No information | Serious risk   | No information |
| <b>Sadick, 2007</b> <sup>45</sup>     | Serious risk | No information | Low risk     | Serious risk   | Serious risk   | Serious risk   | Low risk       |
| <b>Rokhsar, 2008</b> <sup>43</sup>    | Serious risk | No information | Serious risk | Low risk       | Low risk       | Serious risk   | No information |
| <b>Beer, 2008</b> <sup>37</sup>       | Serious risk | No information | Low risk     | Low risk       | Low risk       | Serious risk   | Low risk       |
| <b>Dayan, 2008</b> <sup>55</sup>      | Serious risk | No information | Low risk     | Low risk       | No information | Serious risk   | Low risk       |
| <b>Stupak, 2007</b> <sup>48</sup>     | Serious risk | Low risk       | Low risk     | Low risk       | Low risk       | Low risk       | Low risk       |
| <b>Bernardini, 2014</b> <sup>52</sup> | Serious risk | No information | Serious risk | No information | Low risk       | Serious risk   | Serious risk   |
| <b>Vagefi, 2011</b> <sup>4</sup>      | Serious risk | Moderate risk  | Low risk     | Low risk       | Moderate risk  | Serious risk   | Low risk       |
| <b>Wollina, 2020</b> <sup>11</sup>    | Serious risk | Low risk       | Low risk     | Low risk       | Low risk       | Serious risk   | Low risk       |
| <b>Hevia, 2009</b> <sup>39</sup>      | Serious risk | No information | Low risk     | Low risk       | No information | Serious risk   | Low risk       |
| <b>Fakhre, 2009</b> <sup>38</sup>     | Serious risk | No information | Low risk     | Low risk       | No information | Serious risk   | Low risk       |
| <b>Kim, 2018</b> <sup>8</sup>         | Serious risk | Low risk       | Low risk     | Low risk       | Low risk       | Serious risk   | Low risk       |
| <b>Jansen, 2006</b> <sup>41</sup>     | Serious risk | No information | Low risk     | Serious risk   | Serious risk   | Serious risk   | Low risk       |
| <b>Rovatti, 2020</b> <sup>7</sup>     | Serious risk | Moderate risk  | Low risk     | Low risk       | Low risk       | Serious risk   | Low risk       |
| <b>Custozzo, 2020</b> <sup>68</sup>   | Serious risk | Low risk       | Low risk     | Low risk       | Low risk       | Serious risk   | Low risk       |
| <b>Guida, 2020</b> <sup>67</sup>      | Serious risk | Low risk       | Low risk     | Low risk       | Low risk       | Serious risk   | Low risk       |
| <b>Di Maria, 2024</b> <sup>58</sup>   | Serious risk | Low risk       | Low risk     | Low risk       | Low risk       | Serious risk   | Low risk       |
| <b>Adel, 2023</b> <sup>59</sup>       | Serious risk | Low risk       | Low risk     | Low risk       | Low risk       | Serious risk   | Low risk       |
| <b>De Almeida, 2023</b> <sup>66</sup> | Serious risk | Low risk       | Low risk     | Low risk       | Low risk       | Serious risk   | Low risk       |
| <b>Durariaj, 2024</b> <sup>69</sup>   | Serious risk | Low risk       | Low risk     | Low risk       | Low risk       | Serious risk   | Low risk       |
