# Supplementary material for: A Systematic Review and Meta-analysis of Single-group Studies Assessing the Role of Calcium Hydroxylapatite in Aesthetic Enhancements and Satisfaction
Source: PubMed Central journal article supplement — Plast Reconstr Surg Glob Open. 2024 Dec 26;12(12):e6400. doi: 10.1097/GOX.0000000000006400 (PMC11671094; doi:10.1097/gox.0000000000006400), 2024-12-26
Supplement: gox-12-e6400-s005.pdf [file gox-12-e6400-s005.pdf]

**SDC5.** Assessment methods of the most reported outcomes.

| Outcome                      | Assessment method      | Scoring system                                                                                                                                                                                                                                                                                                                                                                                                                 | Studies                                                                                                                                                                                                                                                                                                                                                                                                                                                                                                                         |
|------------------------------|------------------------|--------------------------------------------------------------------------------------------------------------------------------------------------------------------------------------------------------------------------------------------------------------------------------------------------------------------------------------------------------------------------------------------------------------------------------|---------------------------------------------------------------------------------------------------------------------------------------------------------------------------------------------------------------------------------------------------------------------------------------------------------------------------------------------------------------------------------------------------------------------------------------------------------------------------------------------------------------------------------|
| <b>Aesthetic Improvement</b> | GAIS                   | 5 or 7 point scale; either as “very much improved, much improved, improved, no change, worse” or “much improved, moderately improved, minimally improved, no change, minimally worse, moderately worse, much worse” or “very much improved, much improved, improved, no change, worse, much worse, very much worse”, “little or no improvement, minute improvement; fair improvement, good improvement, excellent improvement” | Pavicic, 2022 <sup>5</sup> ; Barbarino, 2021 <sup>35</sup> ; Juhász, 2018 <sup>12</sup> ; Alghoul, 2020 <sup>34</sup> ; Corduff, 2019 <sup>54</sup> ; Juhász, 2018 <sup>56</sup> ; Wollina, 2020 <sup>11</sup> ; Silvers, 2006 <sup>46</sup> ; Carruthers, 2008 <sup>53</sup> ; Beer, 2008 <sup>37</sup> ; Dayan, 2008 <sup>55</sup> ; Haq, 2010 <sup>19</sup> ; Lapatina, 2017 <sup>61</sup> ; Yutskovskaya, 2017 <sup>65</sup> ; Custozzo, 2020 <sup>68</sup> , Durariaj, 2024 <sup>69</sup> , De Almeida, 2023 <sup>66</sup> |
|                              | GICS                   | 7-point scale from very much worse to very much improved                                                                                                                                                                                                                                                                                                                                                                       | Muti, 2019 <sup>13</sup>                                                                                                                                                                                                                                                                                                                                                                                                                                                                                                        |
|                              | Merz Aesthetics Scale  | 5 point scale; 0 as no wrinkle, 1 mild wrinkle, 2 as moderate wrinkle, 3 as severe wrinkle, 4 as very severe wrinkle                                                                                                                                                                                                                                                                                                           | Muti, 2019 <sup>13</sup>                                                                                                                                                                                                                                                                                                                                                                                                                                                                                                        |
|                              | 3-point scale          | 1 as worse, 2 as no change, and 3 as improvement                                                                                                                                                                                                                                                                                                                                                                               | Bernardini, 2014 <sup>52</sup>                                                                                                                                                                                                                                                                                                                                                                                                                                                                                                  |
|                              | 4-point scale          | Very much improved, improved, unchanged, worse                                                                                                                                                                                                                                                                                                                                                                                 | Beer, 2008 <sup>37</sup>                                                                                                                                                                                                                                                                                                                                                                                                                                                                                                        |
|                              | 5-point scale          | Very much improved, much improved, improved, no change or worse                                                                                                                                                                                                                                                                                                                                                                | Baspeyras, 2017 <sup>51</sup>                                                                                                                                                                                                                                                                                                                                                                                                                                                                                                   |
|                              | TTRS                   | 4 point scale: -1 as worse, 0 as improved, 2 as much improved, and 3 as very much improved                                                                                                                                                                                                                                                                                                                                     | Corduff, 2019 <sup>54</sup>                                                                                                                                                                                                                                                                                                                                                                                                                                                                                                     |
| <b>Satisfaction</b>          | Yes/no                 | -                                                                                                                                                                                                                                                                                                                                                                                                                              | Silvers, 2006 <sup>46</sup>                                                                                                                                                                                                                                                                                                                                                                                                                                                                                                     |
|                              | 3-point scoring system | Either as “0 as unsatisfied, 1 as satisfied, 2 as very satisfied, 3 as extremely satisfied” or “very good, good, acceptable” or “unsatisfied, satisfied, very satisfied”                                                                                                                                                                                                                                                       | Rokhsar, 2008 <sup>43</sup> ; Rovatti, 2020 <sup>7</sup> ; Guida, 2020 <sup>67</sup>                                                                                                                                                                                                                                                                                                                                                                                                                                            |
|                              | 4-point scoring system | Either as “very satisfied, satisfied, no opinion, dissatisfied” or “excellent, good, fair, poor”                                                                                                                                                                                                                                                                                                                               | Tzikas, 2004 <sup>50</sup> ; Stupak, 2007 <sup>48</sup> ; Beer, 2008 <sup>37</sup> , De Almeida, 2023 <sup>66</sup>                                                                                                                                                                                                                                                                                                                                                                                                             |
|                              | 5-point scoring system | Either as “poor, fair, good, very good, excellent” or “very satisfied to very dissatisfied” or “very satisfied, satisfied, neutral, dissatisfied, very dissatisfied” or “worse, little satisfaction or not satisfied, fairly satisfied, satisfied, very satisfied” or “unsatisfactory, poor,                                                                                                                                   | Fakhre, 2009 <sup>38</sup> ; Barbarino, 2021 <sup>35</sup> ; Alghoul, 2020 <sup>34</sup> ; Tanaka, 2014 <sup>49</sup> ; Roy, 2006 <sup>44</sup> ; Sadick, 2007 <sup>45</sup> ; Jansen, 2006 <sup>41</sup> ; Sadick, 2011 <sup>22</sup> ; Guida, 2021 <sup>64</sup> , Adel, 2023 <sup>59</sup>                                                                                                                                                                                                                                   |

|                                                |                           |                                                                                                                                                                                                                                                                                                |                                                                                                                                                                   |
|------------------------------------------------|---------------------------|------------------------------------------------------------------------------------------------------------------------------------------------------------------------------------------------------------------------------------------------------------------------------------------------|-------------------------------------------------------------------------------------------------------------------------------------------------------------------|
|                                                |                           | satisfactory, very good, excellent” or “unsatisfactory to excellent” or “ least satisfied to most satisfied” or “worse, no change, improvement, much improvement, excellent improvement” or “very unsatisfied, unsatisfied, neither satisfied nor dissatisfied, satisfied, and very satisfied” |                                                                                                                                                                   |
|                                                | 6-point scale             | NM                                                                                                                                                                                                                                                                                             | Haq, 2010 <sup>19</sup>                                                                                                                                           |
|                                                | 7-point scale             | on a scale from 0 (Completely Dissatisfied) to 6 (Completely Satisfied)                                                                                                                                                                                                                        | Fabi, 2021 <sup>63</sup>                                                                                                                                          |
|                                                | 10-point scoring system   | 10 as the most satisfied and 0 as the least satisfied                                                                                                                                                                                                                                          | Becker, 2008 <sup>36</sup>                                                                                                                                        |
|                                                | FACE-Q                    | NM                                                                                                                                                                                                                                                                                             | Pavicic, 2022 <sup>5</sup>                                                                                                                                        |
|                                                | Global satisfaction score | 1 as very dissatisfied                                                                                                                                                                                                                                                                         | Amselem, 2016 <sup>60</sup>                                                                                                                                       |
|                                                | Not mentioned             | -                                                                                                                                                                                                                                                                                              | Sklar, 2004 <sup>47</sup> ; Rauso, 2013 <sup>42</sup> ; Kim, 2018 <sup>8</sup> ; Hevia, 2009 <sup>39</sup>                                                        |
| <b>Wrinkle/<br/>Curve/ fold<br/>correction</b> | MNLFS                     | NM                                                                                                                                                                                                                                                                                             | Pavicic, 2022 <sup>5</sup>                                                                                                                                        |
|                                                | MMLS                      | NM                                                                                                                                                                                                                                                                                             | Pavicic, 2022 <sup>5</sup> ; Baspeyras, 2017 <sup>51</sup>                                                                                                        |
|                                                | MJS                       | NM                                                                                                                                                                                                                                                                                             | Boen, 2022 <sup>6</sup>                                                                                                                                           |
|                                                | Multiple scales           | 0 as absent to 4 as very severe                                                                                                                                                                                                                                                                | Rovatti, 2020 <sup>7</sup>                                                                                                                                        |
|                                                | Dayan severity scale      | 5 point scale; 5 as extreme; 4 as severe; 3 as moderate; 2 as mild; 1 as absent                                                                                                                                                                                                                | Dayan, 2008 <sup>55</sup>                                                                                                                                         |
|                                                | MDS                       | 5-point assessment from 0 (no wrinkles) to 4 (very severe wrinkles).                                                                                                                                                                                                                           | Fabi, 2021 <sup>63</sup>                                                                                                                                          |
|                                                | 5-point scale             | 0 as no wrinkles to 5 as very deep wrinkles                                                                                                                                                                                                                                                    | Sadick, 2011 <sup>22</sup>                                                                                                                                        |
|                                                | <b>Thickness</b>          | Caliper                                                                                                                                                                                                                                                                                        | -                                                                                                                                                                 |
| Ultrasound scan/imaging                        |                           |                                                                                                                                                                                                                                                                                                | Lapatina, 2017 <sup>61</sup> ; Wasylkowski, 2015 <sup>62</sup> ; Yutskovskaya, 2017 <sup>65</sup> ; Custozzo, 2020 <sup>68</sup> , De Almeida, 2023 <sup>66</sup> |

GAIS: Global Aesthetic Improvement Scale; WSRS: Wrinkle Severity Rating Scale; MNLFS: Merz Nasolabial Folds Scale; MMLS: Merz Marionette Lines Scale; MJS: Merz Jawline Scale; MHGS: Merz Hand Grading Scale; BHVSS: Validated Busso Hand Volume Severity Scale; LRS: Lemperle Rating Scale; MDS: Merz Décolletage Scale; NM: Not mentioned.
