# Supplementary material for: A Systematic Review and Meta-analysis of Single-group Studies Assessing the Role of Calcium Hydroxylapatite in Aesthetic Enhancements and Satisfaction
Source: PubMed Central journal article supplement — Plast Reconstr Surg Glob Open. 2024 Dec 26;12(12):e6400. doi: 10.1097/GOX.0000000000006400 (PMC11671094; doi:10.1097/gox.0000000000006400), 2024-12-26
Supplement: gox-12-e6400-s006.pdf [file gox-12-e6400-s006.pdf]

A

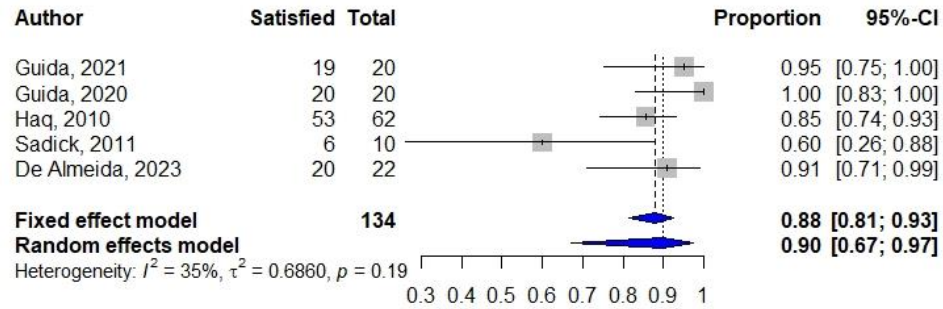

B

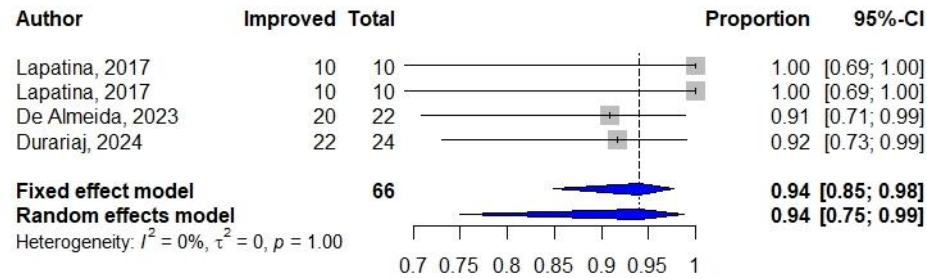

C

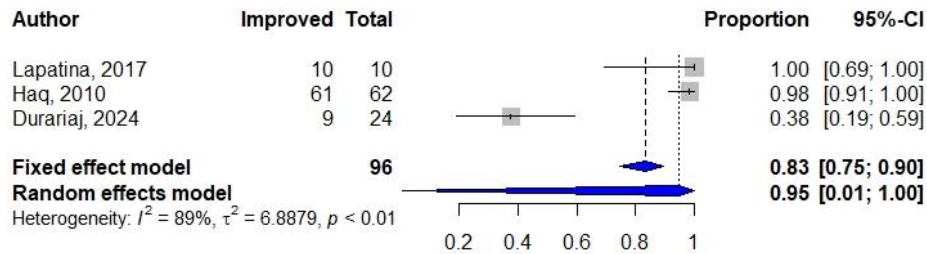

**SDC6.** Summary proportions and pooled estimates of A) Patients satisfaction; B) Patients aesthetic improvement\*; C) Investigators aesthetic improvement\* in other treated body areas.

\*The eligible aesthetic improvement scores are based solely on studies that used the global aesthetic improvement scale.
